# Supplementary material for: Dynamics at the serine loop underlie differential affinity of cryptochromes for CLOCK:BMAL1 to control circadian timing
Source: eLife. 2020 Feb 26;9:e55275. doi: 10.7554/eLife.55275 (PMC7064333; doi:10.7554/eLife.55275)
Supplement: Supplementary file 1. — This supplementary file contains two tables (1a, 1b) on separate tabs. [file elife-55275-supp1.xlsx]

## Sheet: Supplementary File 1a
Average distance and volume of secondary pocket in
frames extracted from FEL minimum for each simulation
		CRY1	CRY2	mutCRY2
	Distance (Å)	17.55 ± 0.08	18.46 ± 0.08	17.85 ± 0.09
	Volume (Å3)	990.47 ± 6.32	1038.67 ± 6.77	938.37 ± 7.93
	Data in this table are represented as mean ± standard deviation

## Sheet: Supplementary File 1b
Number of unique hydrogen bonds involving secondary loop residues
formed with high frequency
		Hydrogen bonds with frequency >5000 frames	Intra-loop H-bonds
	CRY1	59	23 (38.98)*
	CRY2	35	21 (60.00)
	mutCRY2	66	27 (40.91)
	*Number and (percentage of intra-loop H-bonds out of the total high frequency H-bonds)
