# Supplementary material for: Dynamics at the serine loop underlie differential affinity of cryptochromes for CLOCK:BMAL1 to control circadian timing
Source: eLife. 2020 Feb 26;9:e55275. doi: 10.7554/eLife.55275 (PMC7064333; doi:10.7554/eLife.55275)
Supplement: Supplementary file 2. — This supplementary file contains two tables (2a, 2b) on separate tabs. [file elife-55275-supp2.xlsx]

## Sheet: Supplementary File 2a
X-ray crystallography data collection and refinement statistics
		CRY1 PHR:PER2 CBD
	Data collection	PDB: 6OF7
	Space group	P 21 21 21
	Cell dimensions
	a, b, c	72.64, 81.23, 98.10
	, , 	90, 90, 90
	Resolution (Å)*	62.56 – 3.11
		(3.28-3.11)
	Rmerge	17.1 (65.2)
	Total reflections	62925 (9485)
	Unique reflections	10939 (1564)
	CC1/2	0.99 (0.75)
	I/	7.5 (3.0)
	Completeness	100 (100)
	Redundancy	5.8 (6.1)
	Refinement
	Rwork/Rfree	20.8/26.2
	Number of atoms	4424
	Protein	4424
	Water	-
	Ligands	-
	Bond lengths	0.003
	Bond angles	0.43
	Average B factor	60.72
	Ramachandran Favored/Outliers (%)	99.45/0.55
	*Values in parentheses are for highest resolution shell.

## Sheet: Supplementary File 2b
	Details for the top two clusters of the HADDOCK model
	for the PER2 CBD:CRY1 PHR:CLOCK PAS-B complex.
	Cluster ID	1	2
	Cluster Size	92	80
	z-score	-0.4	-1.9
	RMSD from lowest energy structure (Å)	11.7 ± 0.3	0.8 ± 0.5
	Van der Waals (kcal/mol)	-64.5 ± 4.2	-73.5 ± 4
	Electrostatic (kcal/mol)	-241.6 ± 29.2	-230.8 ± 23.1
	Desolvation (kcal/mol)	-22.9 ± 6.0	-45.3 ± 4.8
	Restraints Violation (kcal/mol)	3.7 ± 2.0	52 ± 20.4
	Buried Surface Area(Å2)	1841.9 ± 61.8	2134.9 ± 106.1
	Data in this table are represented as mean ± standard deviation
