# Supplementary figures and images for: Dynamics at the serine loop underlie differential affinity of cryptochromes for CLOCK:BMAL1 to control circadian timing
Source: eLife journal article supplement (doi:10.7554/elife.55275), 2020-02-26

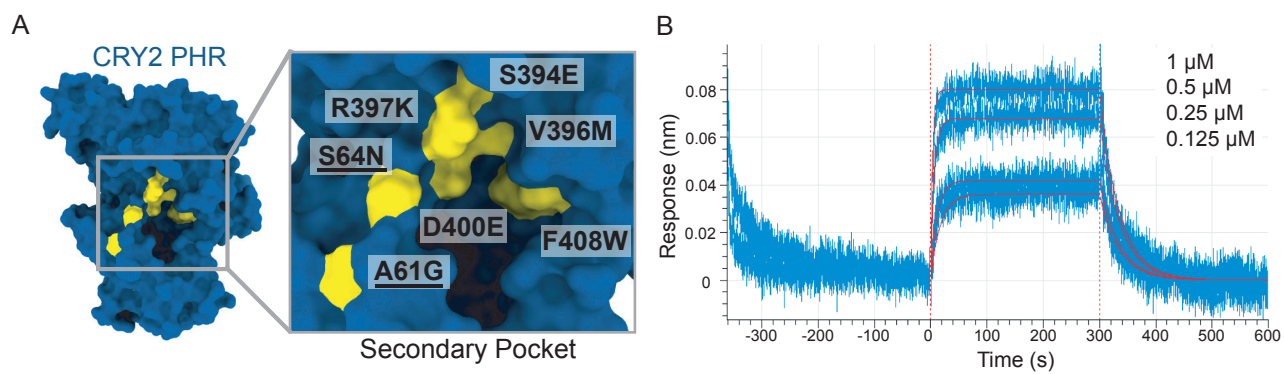

Figure 3-figure supplement 2

Supplement: supp [file elife-55275-supp-v1.zip]

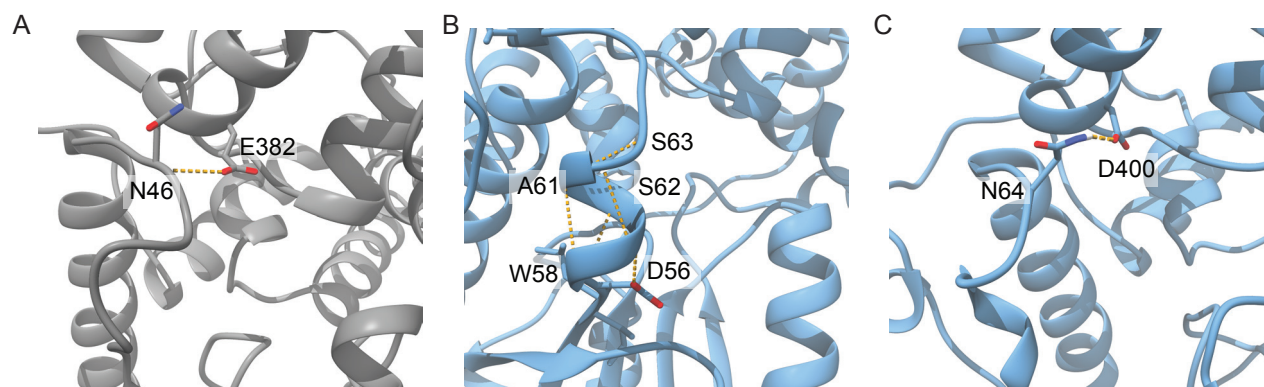

Figure 3-figure supplement 3

Supplement: supp [file elife-55275-supp-v1.zip]

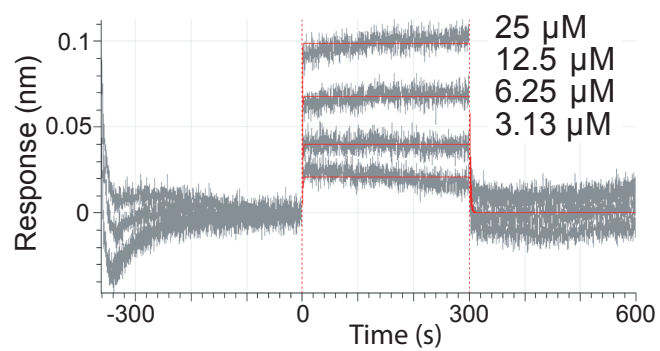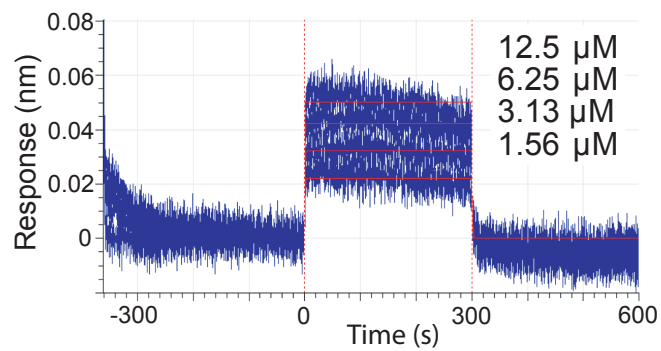

Figure 4-figure supplement 3

Supplement: supp [file elife-55275-supp-v1.zip]

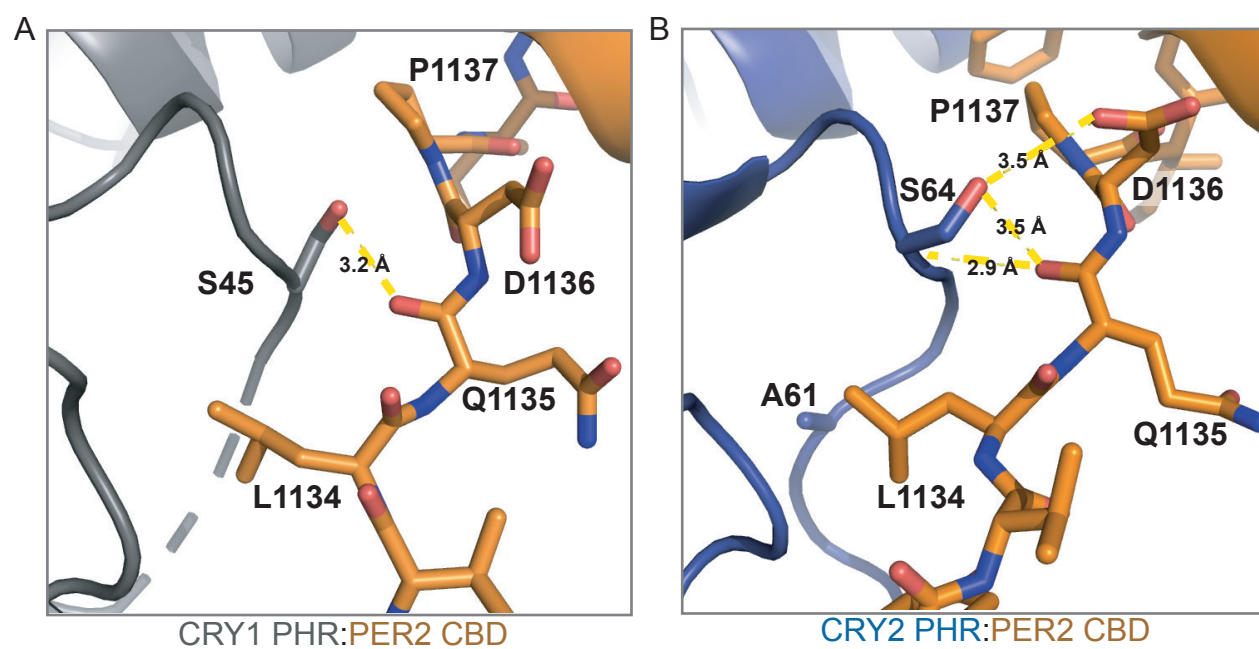

Figure 5-figure supplement 1

Supplement: supp [file elife-55275-supp-v1.zip]

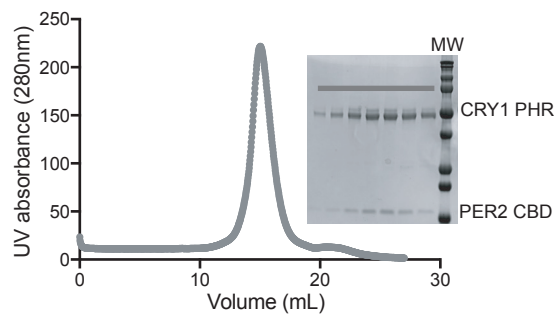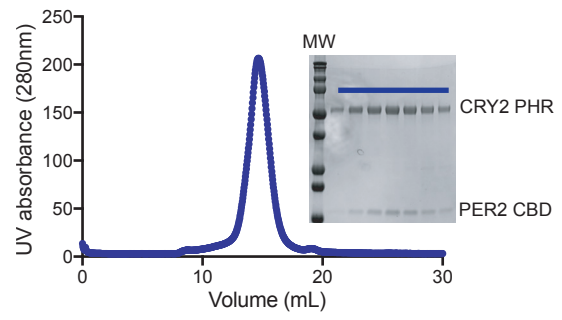

Figure 5-figure supplement 2

Supplement: supp [file elife-55275-supp-v1.zip]

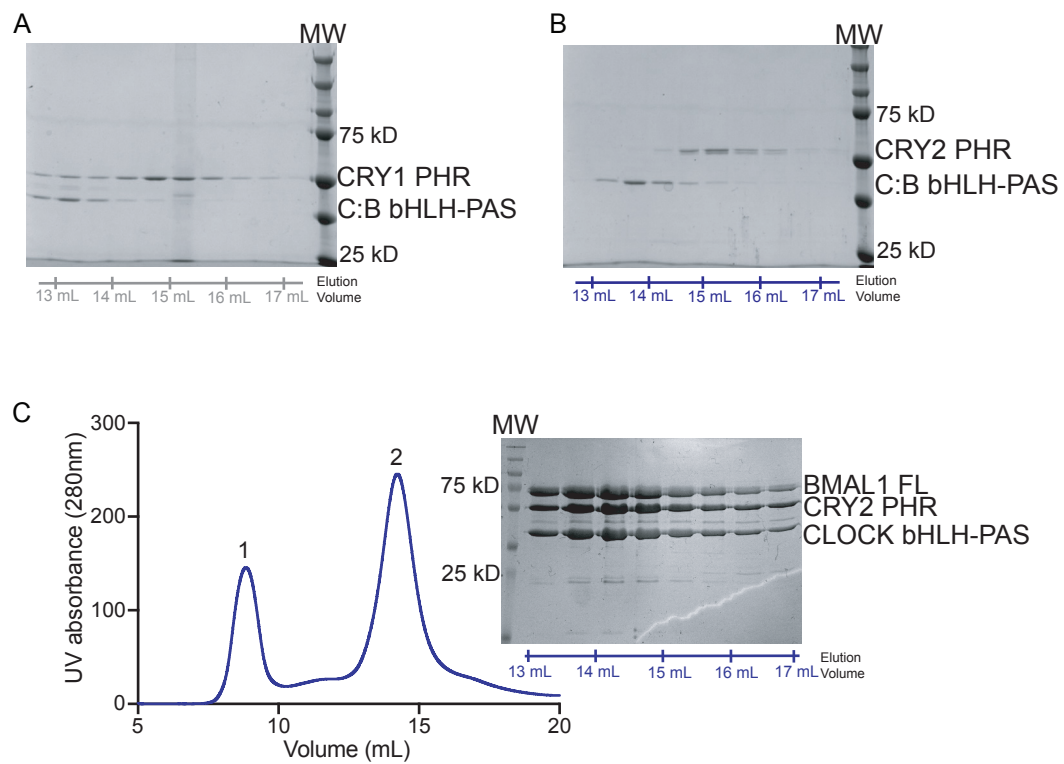

Figure 2-figure supplement 1

Supplement: supp [file elife-55275-supp-v1.zip]

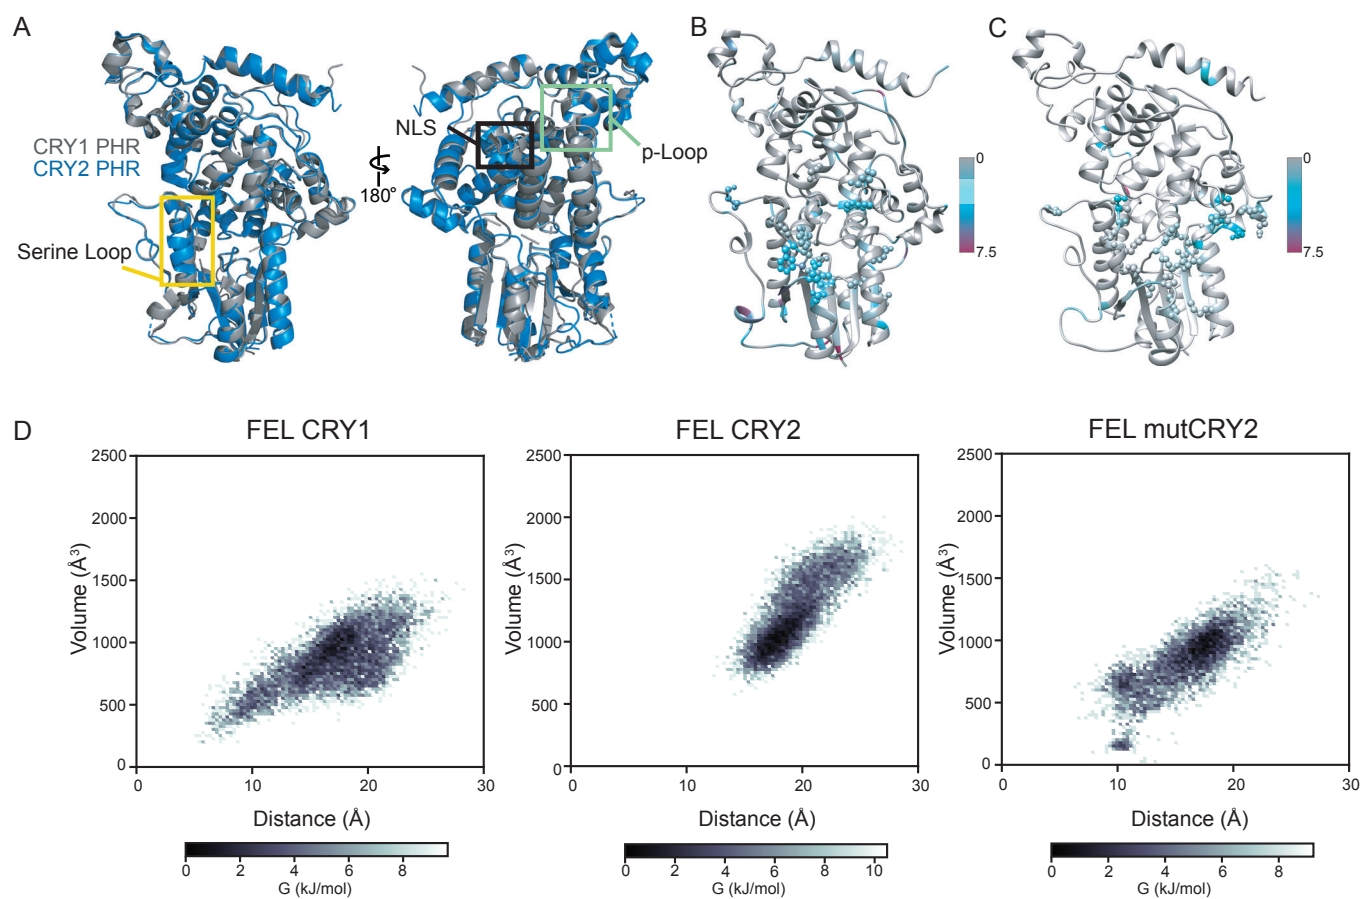

Figure 3-figure supplement 1

Supplement: supp [file elife-55275-supp-v1.zip]

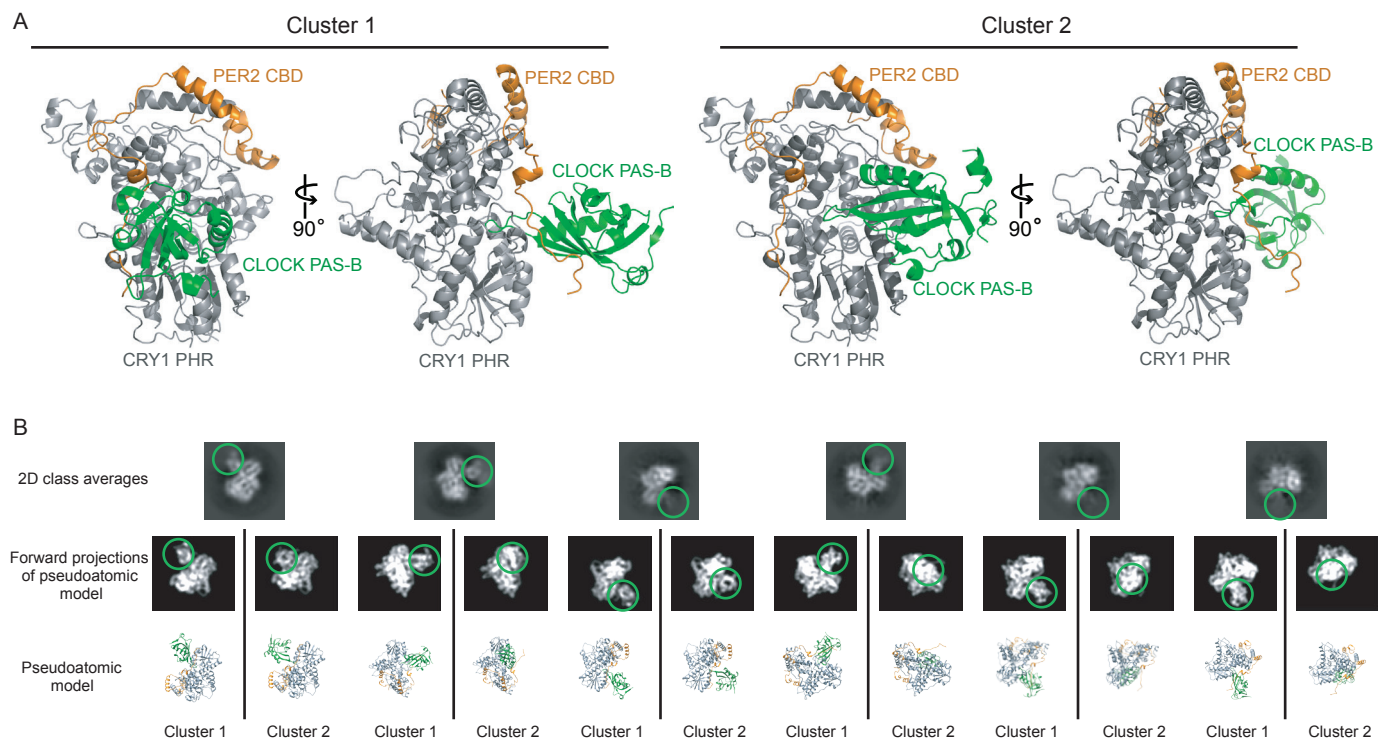

Figure 4-figure supplement 2

Supplement: supp [file elife-55275-supp-v1.zip]

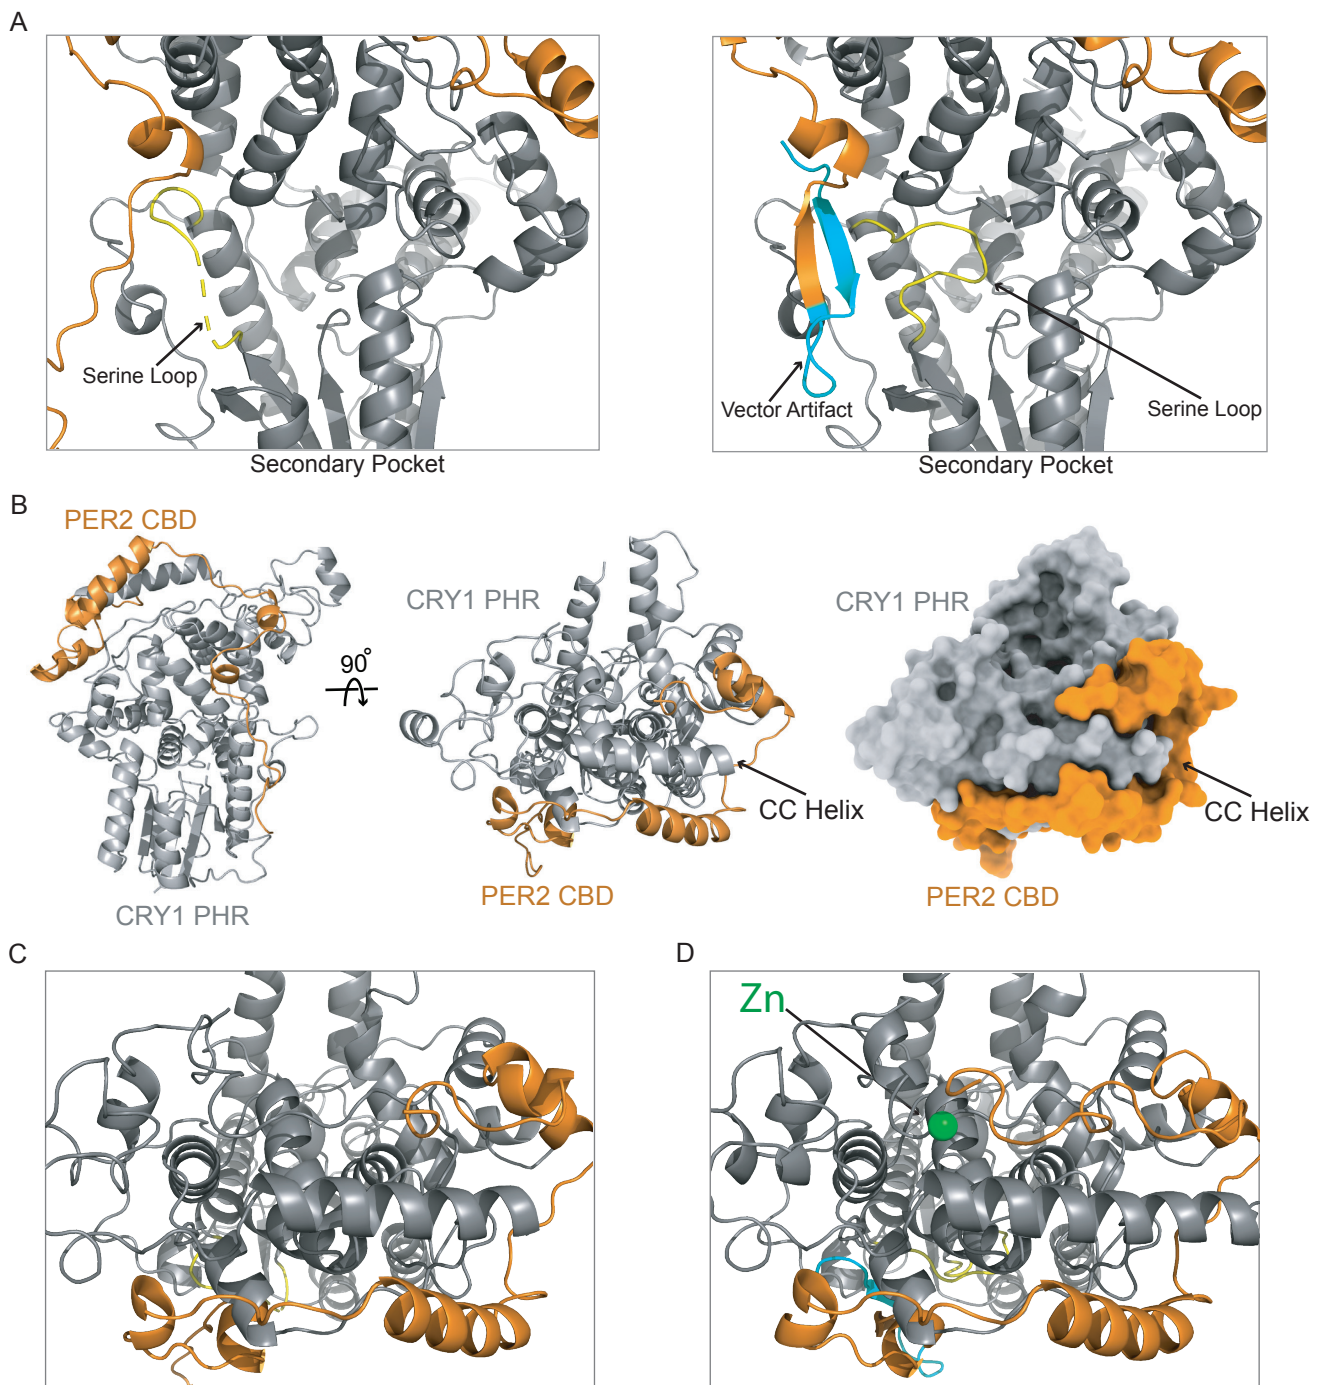

Figure 4-figure supplement 1

Supplement: supp [file elife-55275-supp-v1.zip]

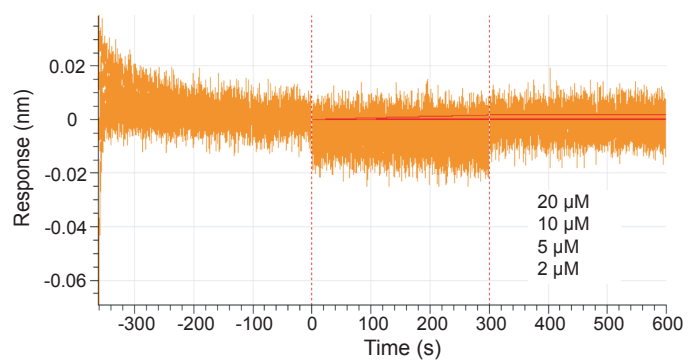

Figure 5-figure supplement 3

Supplement: supp [file elife-55275-supp-v1.zip]
